# Supplementary material
Source: HighWire-hosted journal article supplement (http://bmjopenquality.bmj.com/highwire/filestream/136172/field_highwire_adjunct_files/1/ds1994.pdf)

**Figure 1** – Example of sticker for affixation to front of patient drug chart highlighting ‘at risk’ patient for EVTEP

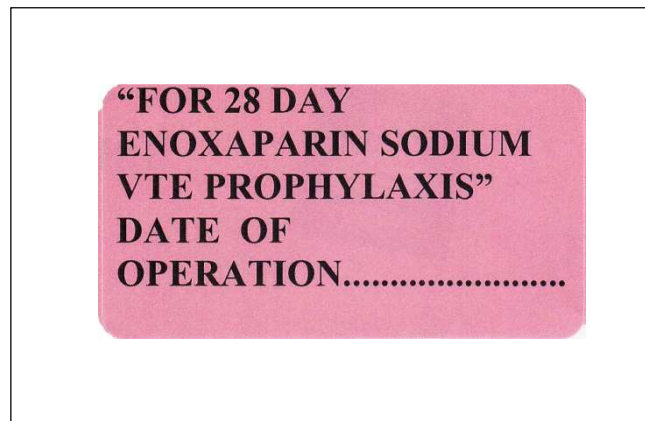

**Figure 2** – Graph to show results for Standard 1: Was the patient identified in pre-operative assessment clinic and placed on EVTEP programme?

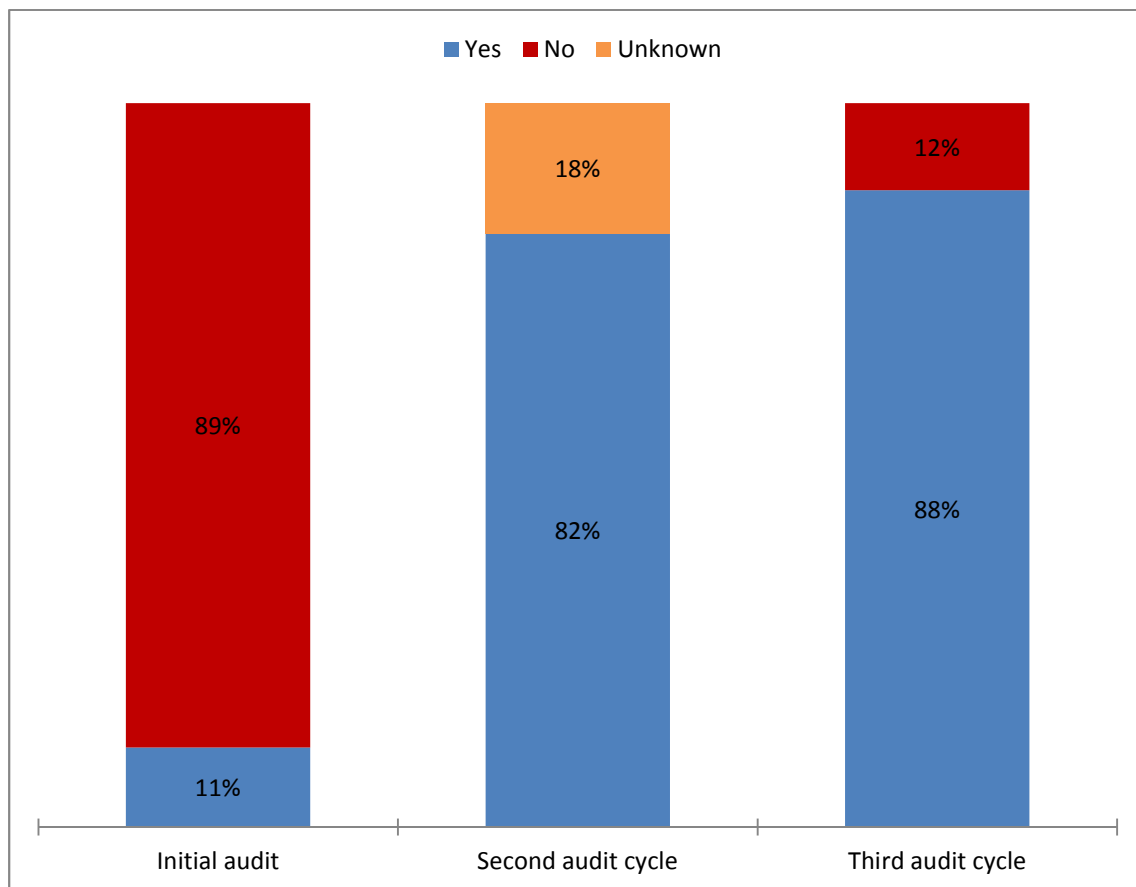

**Figure 3** – Graph to show results for Standard 2: Was the patient given information regarding VTE and EVTE in pre-operative assessment clinic?

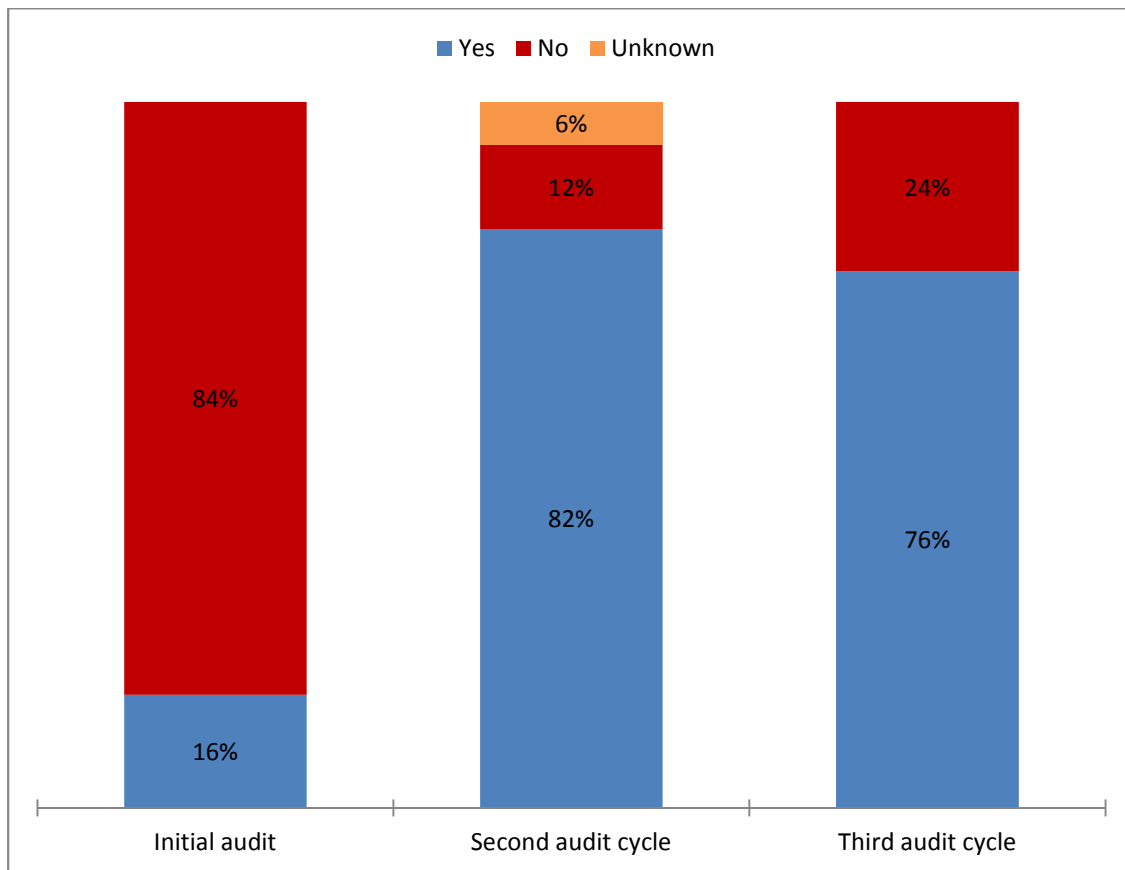

**Figure 4** – Graph to show results for Standard 3: Was the patient warned about potential side-effects and what to do if experienced?

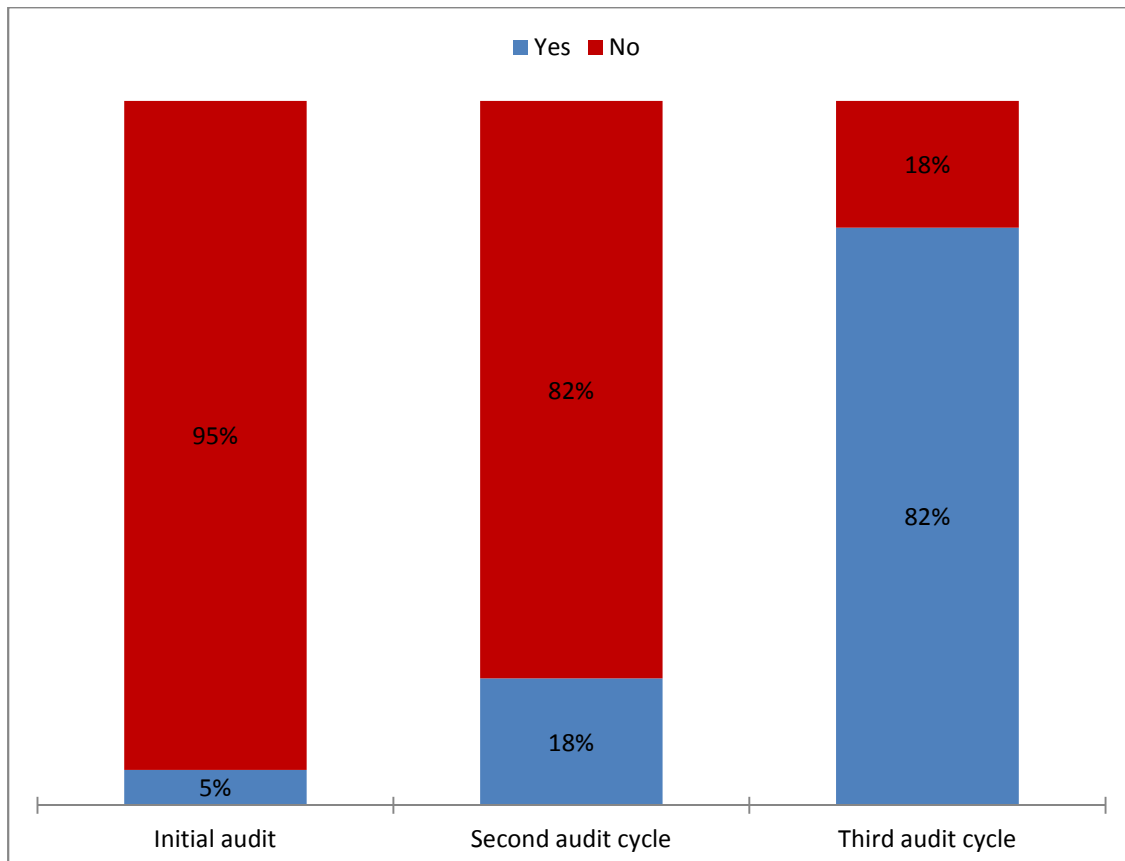

**Figure 5 – Graph to show results for Standard 4: Was there a sticker affixed to front of patient’s drug chart highlighting the fact that they are for EVTEP?**

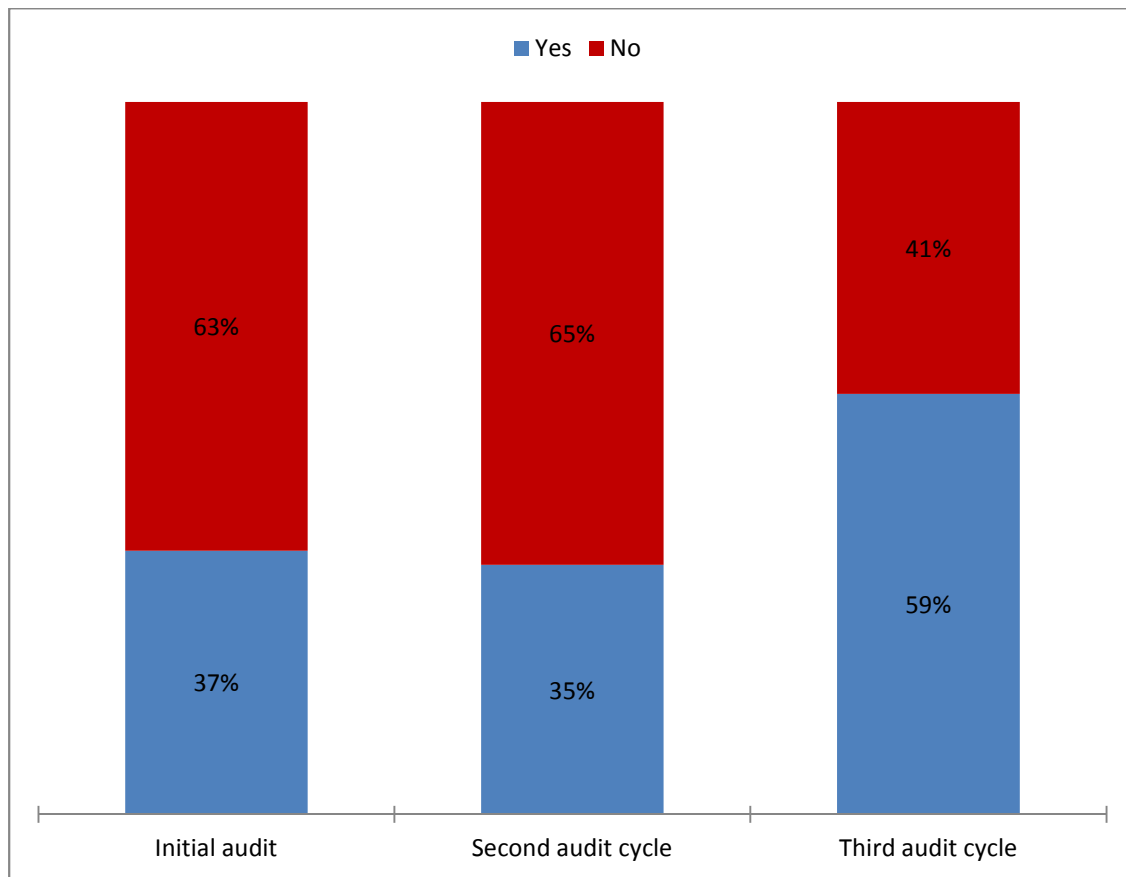

**Figure 6 – Graph to show results for Standard 5: Was the patient taught how to self-inject whilst on the ward?**

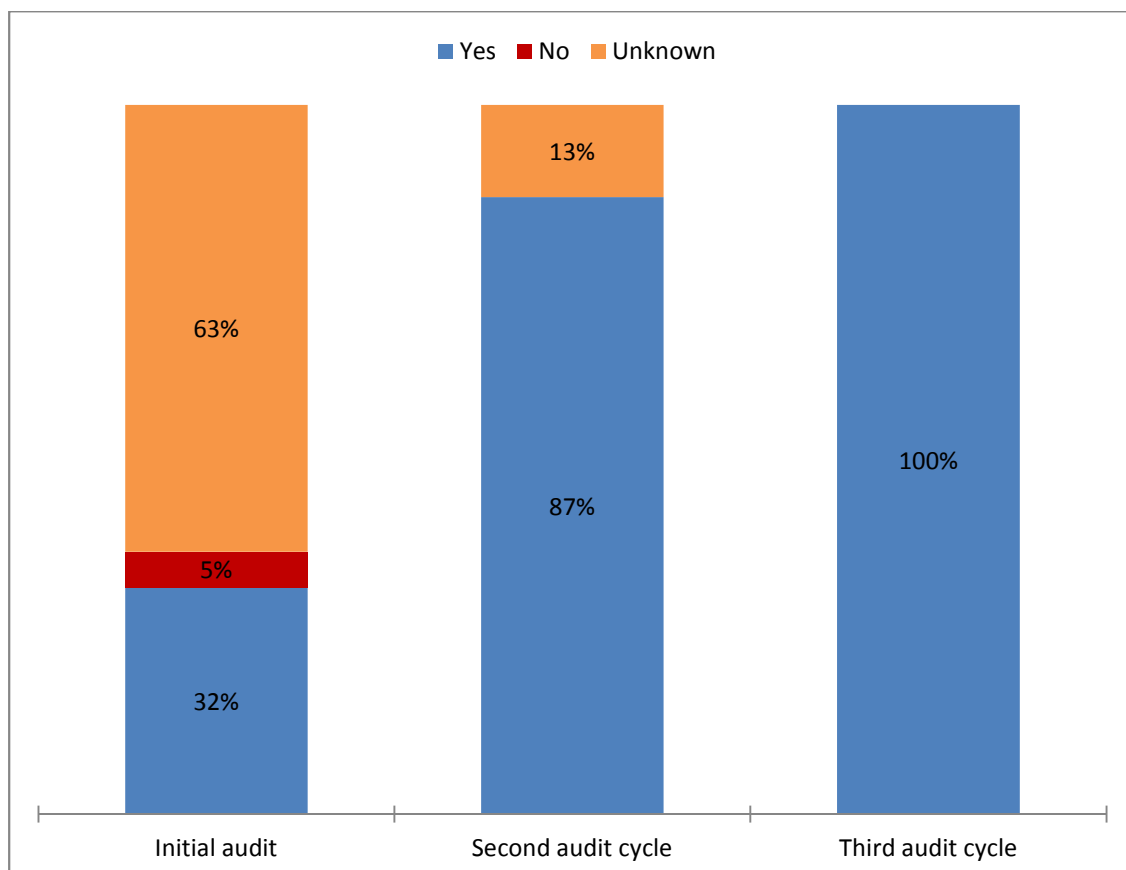

**Figure 7** – Graph to show results for Standard 6: Was the patient taught how to safely dispose of syringes?

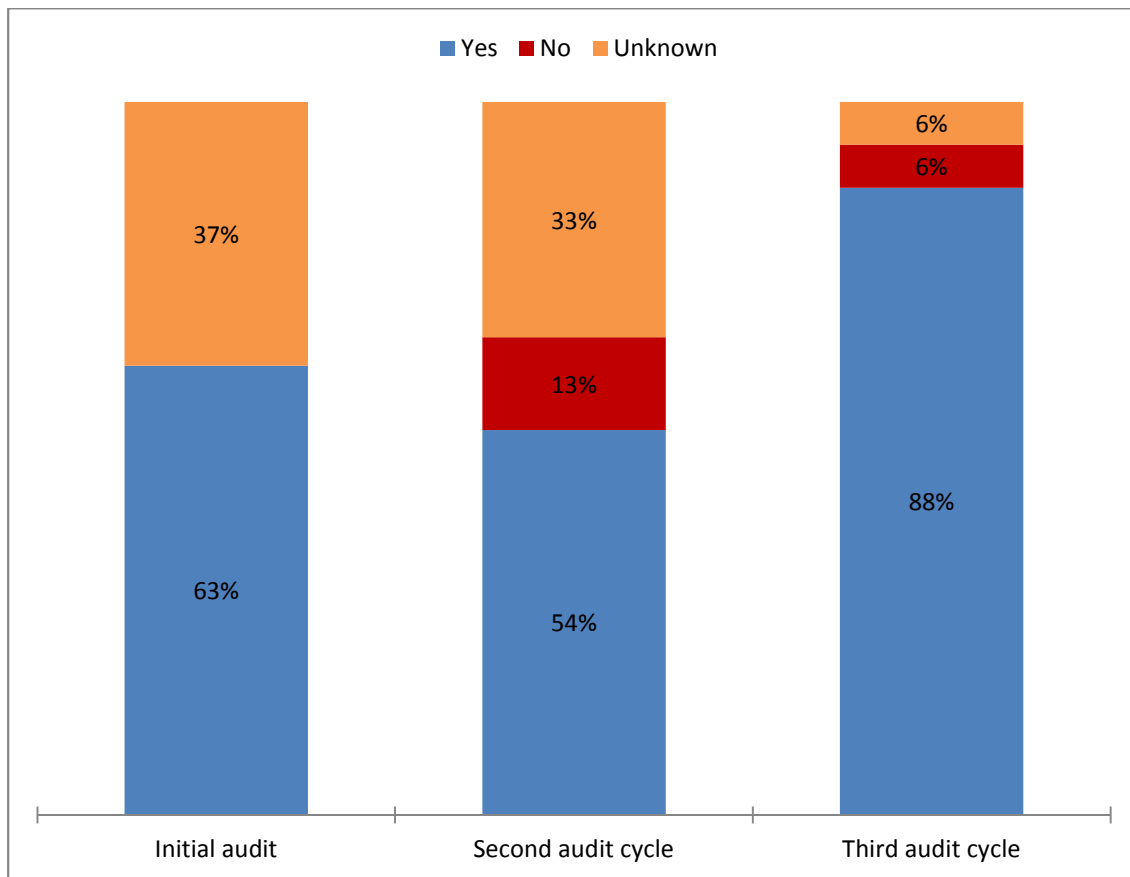

**Figure 8** – Graph to show results for Standard 7: Was the patient confident with EVTEP and self-administration at discharge?

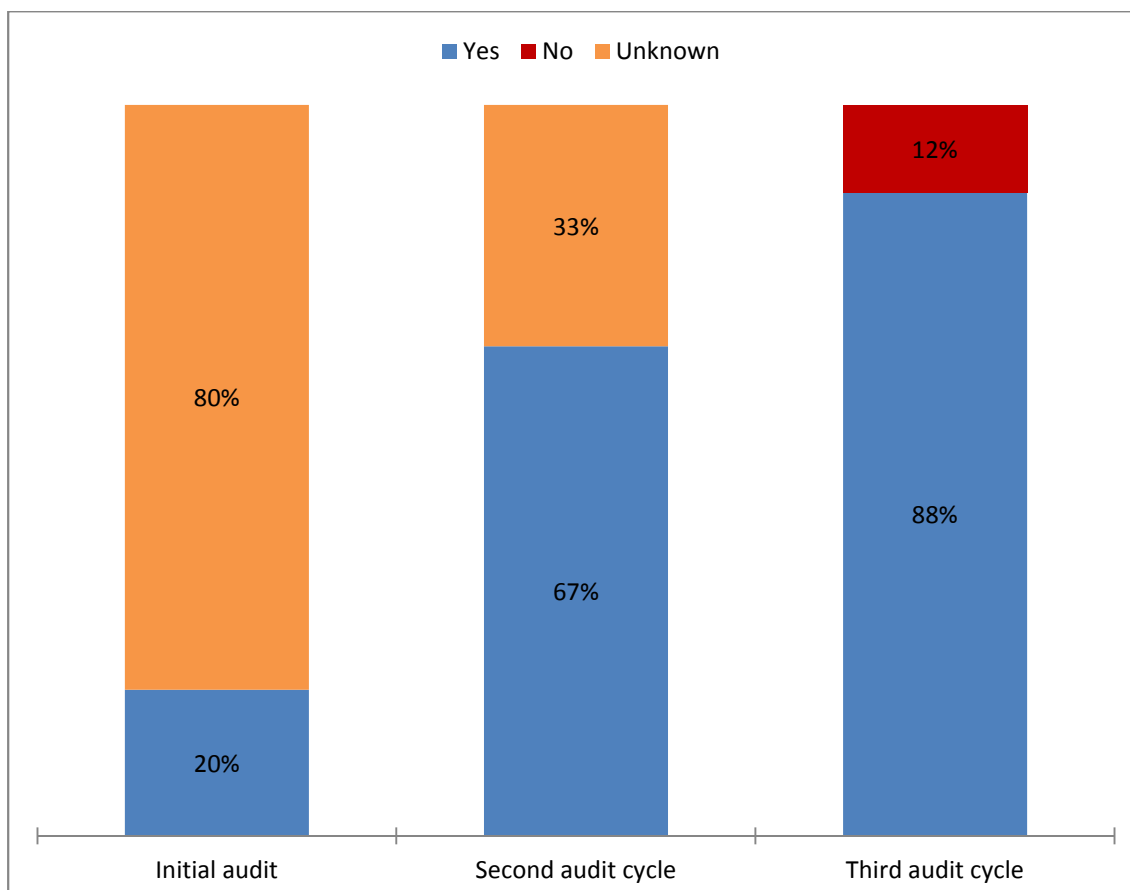

**Figure 9** – Graph to show results for Standard 8: Was the patient’s discharge letter correctly completed and GP advised about monitoring?

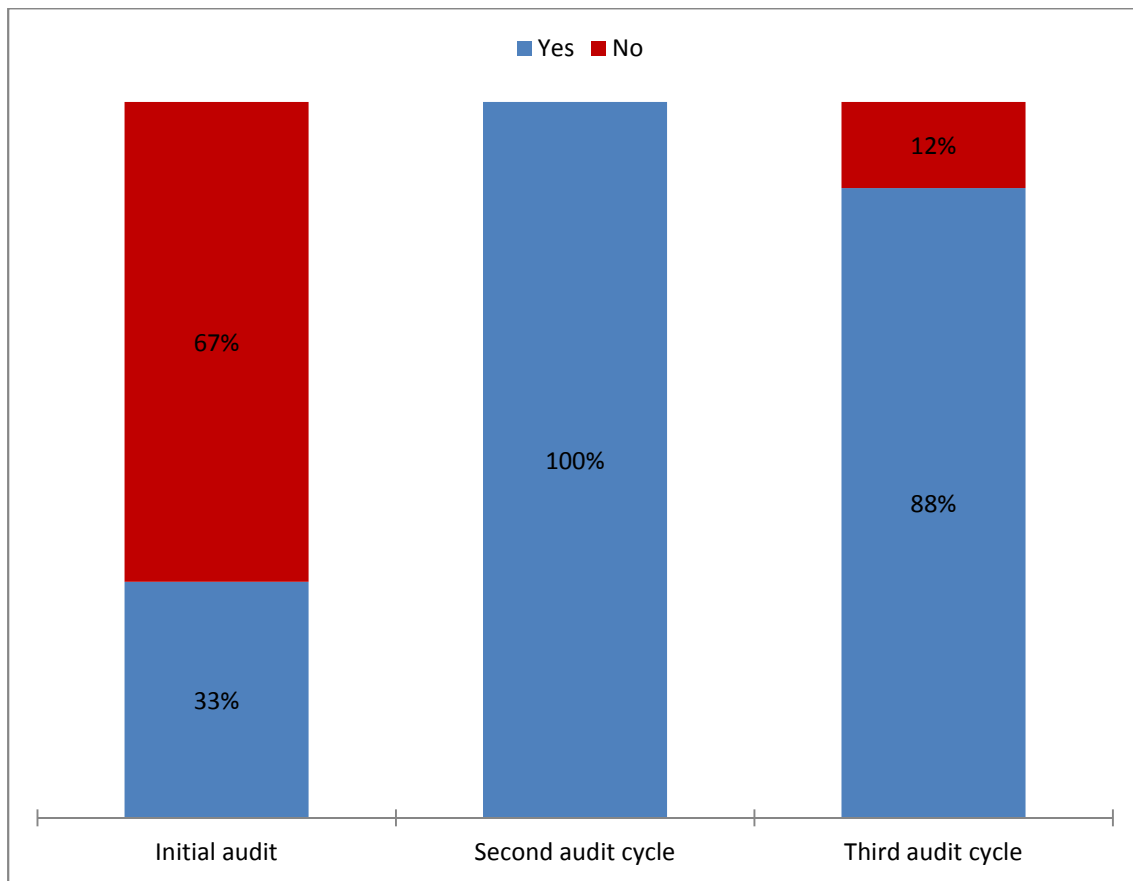

**Figure 10** – Graph to show whether the patient was prescribed EVTEP on discharge

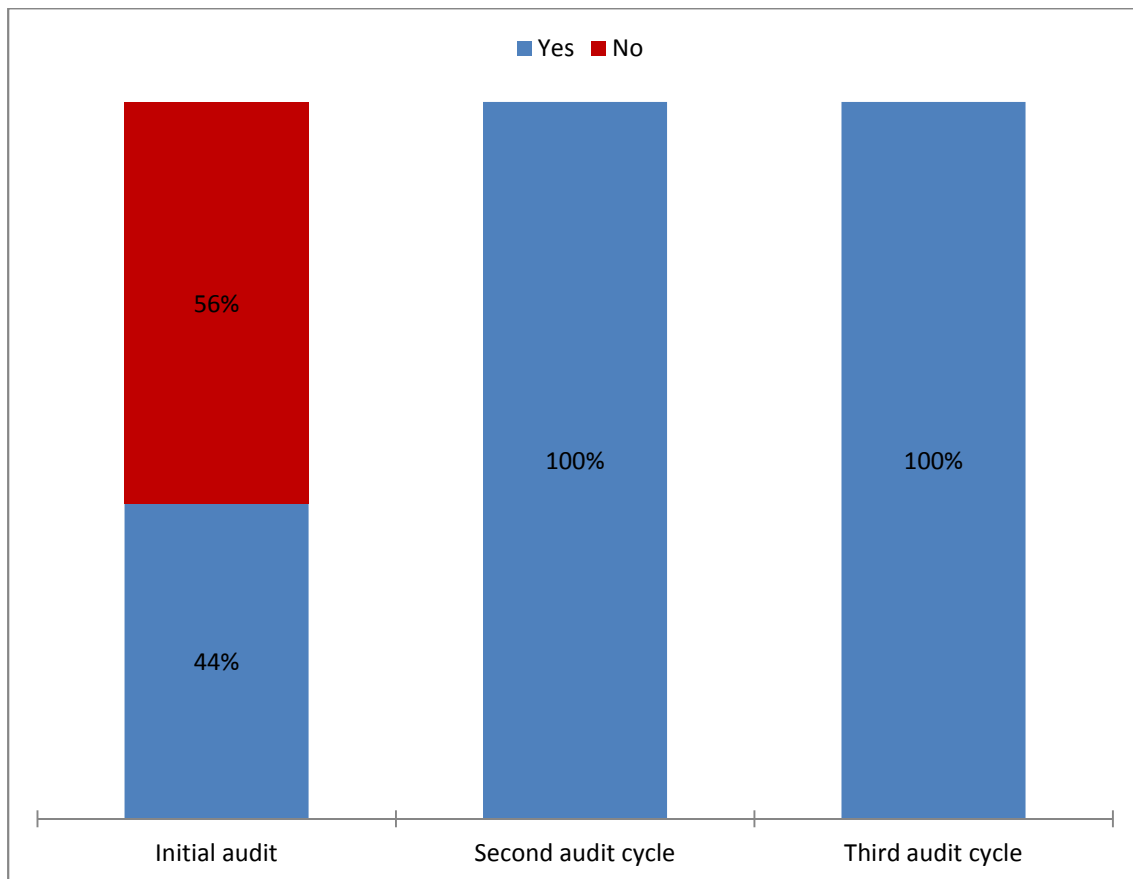

Supplement: ds1994.pdf [file ds1994.pdf]
